# Supplementary material for: The Action Mechanism of the Myc Inhibitor Termed Omomyc May Give Clues on How to Target Myc for Cancer Therapy
Source: PLoS One. 2011 Jul 21;6(7):e22284. doi: 10.1371/journal.pone.0022284 (PMC3141027; doi:10.1371/journal.pone.0022284)
Supplement: Table S1 — List of genes organized into two pages (UP Omomer and DOWN Omomer) according to whether they are activated or repressed by Omomyc upon 90 min of serum stimulation of Rat1 cells. Genes were selected according to the criteria described in Results. Gene ID, gene symbol and name are shown, together with the probe set ID of the Affymetrix U34A array. The last two columns denote, respectively, whether genes are listed as upregulated (UP) or downregulated (DOWN) by Myc in the Myc target gene database and whether their promoters are listed as Myc bound promoters in either one of two studies performed in embryonic stem cells [36], [37]. (XLS) [file pone.0022284.s001.xls]

## Sheet: UP Control
Genes upregulated in the absence of Omomyc: t 90 min
Probe set ID	Gene ID	Symbol	Name	MYC target gene database	Myc binding in ES Cells
rc_AA893242_g_at	25288	Acsl1	acyl-CoA synthetase long-chain family member 1
rc_AA900989_at	114024	Acsl3	Acyl-CoA synthetase long-chain family member 3		x
rc_AI045002_at	113976	Acsl4	Acyl-CoA synthetase long-chain family member 4
J00692_at	29437	Acta1	actin, alpha 1, skeletal muscle
rc_AA900769_s_at	81633	Acta2	smooth muscle alpha-actin
M22323_at	25365	Actg2	actin, gamma 2, smooth muscle, enteric
rc_AI070967_at	25379	Anp32a	Acidic (leucine-rich) nuclear phosphoprotein 32 family, member A		x
AB012600_s_at	29657	Arntl	aryl hydrocarbon receptor nuclear translocator-like
D29766cds#1_s_at	25414	Bcar1	breast cancer anti-estrogen resistance 1
S77492_i_at	25667	Bmp3	bone morphogenetic protein 3
U49930_at	25402	Casp3	caspase 3	DOWN
rc_AI043968_g_at	29161	Cav3	caveolin 3
A30543cds_s_at	25406	Cd44	Cd44 molecule
U23056_at	287009	Ceacam10	carcinoembryonic antigen-related cell adhesion molecule 10
AF069775_at	89828	Chl1	cell adhesion molecule with homology to L1CAM
L02634_s_at	85259	Cnga1	cyclic nucleotide gated channel alpha 1
D14437_s_at	65204	Cnn1	calponin 1, basic, smooth muscle
U35099_at	116657	Cplx2	complexin 2
AF013144_at	171109	Dusp5	dual specificity phosphatase 5
X98377_at	25437	Emd	emerin
Z54212_at	25314	Emp1	epithelial membrane protein 1	UP
rc_AI169756_s_at	313729	Errfi1	ERBB receptor feedback inhibitor 1
S52128_s_at	24890	Esr1	estrogen receptor 1
L20681_at	24356	Ets1	v-ets erythroblastosis virus E26 oncogene homolog 1 (avian)
M95591_at	29580	Fdft1	farnesyl diphosphate farnesyl transferase 1
X07285cds_s_at	54250	Fgf2	fibroblast growth factor 2
rc_AA891527_at	63839	Fhl2	four and a half LIM domains 2
rc_AA799773_at	362332	Flnc	filamin C, gamma
X82152_at	64507	Fmod	fibromodulin
M19651_at	25445	Fosl1	fos-like antigen 1	UP
rc_AA858520_g_at	24373	Fst	follistatin
J05181_at	25283	Gclc	glutamate-cysteine ligase, catalytic subunit	UNKNOWN	x
L38615_at	25458	Gss	glutathione synthetase
S82820mRNA_s_at	494500	Gsta5	glutathione S-transferase Yc2 subunit
rc_AI008741_at	25694	Has2	hyaluronan synthase 2	UP	x
L05489_at	25433	Hbegf	heparin-binding EGF-like growth factor
D26393exon_s_at	25059	Hk2	hexokinase 2	UP	x
M29249cds_at	25675	Hmgcr	3-hydroxy-3-methylglutaryl-Coenzyme A reductase
AB003726_at	29546	Homer1	homer homolog 1 (Drosophila)
M14050_s_at	25617	Hspa5	heat shock protein 5
M64867_at	29595	Htr2a	5-hydroxytryptamine (serotonin) receptor 2A
L23148_g_at	25261	Id1	inhibitor of DNA binding 1
AF000942_at	25585	Id3	inhibitor of DNA binding 3	DOWN	x
rc_AI014163_at	29596	Ifrd1	interferon-related developmental regulator 1		x
U04319_at	25556	Il1rl1	interleukin 1 receptor-like 1	UP
M37482_at	29200	Inhba	inhibin beta-A	DOWN
X74293_s_at	81008	Itga7	integrin, alpha 7
U93306_at	25589	Kdr	kinase insert domain receptor
AF035953_at	307644	Kifc3	kinesin family member C3
X13722_at	300438	Ldlr	low density lipoprotein receptor		x
D31874_at	29524	Limk2	LIM domain kinase 2
rc_AA859976_at	685834	LOC685834	Similar to zinc finger protein 740
rc_AA799657_at	686781	LOC686781	similar to NFkB interacting protein 1
rc_AI639395_at	688459	LOC688459	hypothetical protein LOC688459
rc_AI639012_at	316842	Metrnl	meteorin, glial cell differentiation regulator-like
rc_AA799566_g_at	171124	Mms19l	MMS19-like (MET18 homolog, S. cerevisiae)
AF004811_at	81521	Msn	moesin	DOWN
rc_AA892399_at	311403	Mtfr1	Mitochondrial fission regulator 1
rc_AA894297_at	309255	Mtmr10	myotubularin related protein 10
Y00396mRNA_g_at	24577	Myc	myelocytomatosis oncogene	DOWN
S68736_at	287408	Myh1	myosin, heavy polypeptide 1, skeletal muscle, adult
S77900_at	296313	Myl9	myosin, light chain 9, regulatory
rc_AA955302_at	25484	Myo1e	myosin IE
D83661_s_at	24599	Nos2	nitric oxide synthase 2, inducible
J02679_s_at	24314	Nqo1	NAD(P)H dehydrogenase, quinone 1
rc_AI176710_at	58853	Nr4a3	nuclear receptor subfamily 4, group A, member 3
U02315_at	112400	Nrg1	neuregulin 1
U88958_at	83834	Nrn1	neuritin 1
AF000899_at	245922	Nupl1	nucleoporin like 1		x
J04792_at	24609	Odc1	ornithine decarboxylase 1	UP	x
rc_AA875244_at	316064	Oxsr1	oxidative-stress responsive 1
AB005540_g_at	314743	Pctk2	PCTAIRE protein kinase 2
D10106_s_at	25266	Pdgfa	platelet-derived growth factor alpha polypeptide
U48247_g_at	64353	Pdlim5	PDZ and LIM domain 5
M61219_s_at	25344	Phb	prohibitin	UP	x
X71898_at	50692	Plaur	plasminogen activator, urokinase receptor	DOWN
rc_AI639058_s_at	311676	Pmepa1	prostate transmembrane protein, androgen induced 1
M20722_s_at	287750	Prp2l1	proline rich protein 2-like 1
L25925_s_at	29527	Ptgs2	prostaglandin-endoperoxide synthase 2
L12025_at	25066	PVR	poliovirus receptor
rc_AA893607_at	360820	Pxn	paxillin
AF002251_at	54355	Rassf5	Ras association (RalGDS/AF-6) domain family member 5
S61868_at	24771	Sdc4	syndecan 4
M24067_at	24617	Serpine1	serine (or cysteine) peptidase inhibitor, clade E, member 1	UP
rc_AA866306_at	360848	Shisa4	shisa homolog 4 (Xenopus laevis)
L19931_at	29502	Slc20a2	solute carrier family 20 (phosphate transporter), member 2
AF055286_at	29504	Slc22a3	solute carrier family 22 (extraneuronal monoamine transporter), member 3	UNKNOWN
M13979_at	24778	Slc2a1	solute carrier family 2 (facilitated glucose transporter), member 1	UP
rc_AA957917_s_at	25648	Slc7a1	solute carrier family 7 (cationic amino acid transporter, y+ system), member 1	UNKNOWN	x
rc_AA892798_at	266803	Sostdc1	sclerostin domain containing 1
M83107_at	25123	Tagln	transgelin	UNKNOWN
U15550_at	116640	Tnc	tenascin C
M15474cds_s_at	24851	Tpm1	tropomyosin 1, alpha	UNKNOWN
rc_AA891286_at	58819	Txnrd1	thioredoxin reductase 1	UP	x
rc_AA859827_at	304944	Uck2	uridine-cytidine kinase 2		x
D38065exon_s_at	24861	Ugt1a1	UDP glucuronosyltransferase 1 family, polypeptide A1
L20913_s_at	83785	Vegfa	vascular endothelial growth factor A
U67083_at	286979	Zfp455	zinc finger protein 455
rc_AA799580_at	---
rc_AA800708_at	---
rc_AA866419_at	---
rc_AA875126_at	---
rc_AA875126_g_at	---
rc_AA892414_at	---
rc_AA893603_at	---
rc_AI639181_at	---
rc_AI639299_i_at	---
rc_AI639307_at	---
rc_H31859_at	---
S56464mRNA_at	---
S56464mRNA_g_at	---

## Sheet: DOWN Control
Genes downregulated in the absence of Omomyc: t 90 min
Probe set ID	Gene ID	Symbol	Name	MYC target gene database	Myc binding in ES Cells
U35775_at	25230	Add3	adducin 3 (gamma)
M15327_at	24172	Adh1	alcohol dehydrogenase 1 (class I)
D15069_s_at	25026	Adm	adrenomedullin	DOWN
U41453_at	83425	Akap12	A kinase (PRKA) anchor protein 12	DOWN	x
rc_AA860055_at	304648	Asf1b	ASF1 anti-silencing function 1 homolog B (S. cerevisiae)		x
D13978_s_at	59085	Asl	argininosuccinate lyase
rc_AI638939_at	303970	Bbx	bobby sox homolog (Drosophila)
rc_AA859938_at	140923	Bnip3l	BCL2/adenovirus E1B interacting protein 3-like
rc_AI236721_r_at	306262	Btd	biotinidase
M60921_g_at	29619	Btg2	BTG family, member 2		x
rc_H31604_at	171576	Bub1b	budding uninhibited by benzimidazoles 1 homolog, beta (S. cerevisiae)		x
M88751_at	25297	Cacnb3	calcium channel, voltage-dependent, beta 3 subunit
rc_AA998164_s_at	25203	Ccnb1	cyclin B1	UP	x
M65149_at	25695	Cebpd	CCAAT/enhancer binding protein (C/EBP), delta
E04239cds_s_at	29194	Chka	choline kinase alpha		x
L16532_at	25275	Cnp	2',3'-cyclic nucleotide 3' phosphodiesterase
L07736_at	25757	Cpt1a	carnitine palmitoyltransferase 1a, liver
AF047384_at	56725	Cript	cysteine-rich PDZ-binding protein	UNKNOWN
U26033_at	83842	Crot	carnitine O-octanoyltransferase
U17035_s_at	245920	Cxcl10	chemokine (C-X-C motif) ligand 10	DOWN
rc_AA874827_at	289997	Dlgap5	discs, large (Drosophila) homolog-associated protein 5
L07315_at	94199	Dpep1	dipeptidase 1 (renal)
rc_AI104012_at	25255	Dyrk1a	dual-specificity tyrosine-(Y)-phosphorylation regulated kinase 1A
rc_AA799328_at	499322	Fam111a	family with sequence similarity 111, member A
rc_AI639161_at	367235	Fam135a	family with sequence similarity 135, member A
rc_AI639324_at	307390	Fbxo38	F-box protein 38
M32062_at	116591 /// 498276	Fcgr2a /// LOC498276	Fc fragment of IgG, low affinity IIa, receptor (CD32) /// Fc gamma receptor II beta
X03347cds_g_at	314322	Fos	FBJ osteosarcoma oncogene
L02529_at	58868	Fzd1	frizzled homolog 1 (Drosophila)	DOWN
L02530_at	64512	Fzd2	frizzled homolog 2 (Drosophila)		x
L32591mRNA_at	25112	Gadd45a	growth arrest and DNA-damage-inducible, alpha	DOWN
D16102_at	79223	Gk	glycerol kinase
L35921_g_at	245986	Gng8	guanine nucleotide binding protein (G protein), gamma 8
AF076619_at	58844	Grb14	growth factor receptor bound protein 14
rc_AI138143_at	29487	Gstt2	Glutathione S-transferase, theta 2		x
rc_AI639037_at	314543	Gulp1	GULP, engulfment adaptor PTB domain containing 1
U09551_at	27080	Hbp1	HMG-box transcription factor 1	UNKNOWN
rc_AA892314_at	24479	Idh1	isocitrate dehydrogenase 1 (NADP+), soluble		x
rc_AA799711_at	288264	Ifnar1	interferon (alpha, beta and omega) receptor 1	UNKNOWN
M34253_g_at	24508	Irf1	interferon regulatory factor 1
D28508_at	25326	Jak3	Janus kinase 3
rc_AA945867_at	24516	Jun	Jun oncogene
rc_AA800678_g_at	100361376	LOC100361376	rCG31687-like
rc_AA893980_g_at	678741	LOC678741	similar to Zinc finger CCCH-type domain containing protein 6
rc_AA892635_g_at	681086	LOC681086	similar to Phosphatidylinositol-glycan biosynthesis, class F protein (PIG-F)
rc_AA799534_at	686590	LOC686590	similar to IQ motif and Sec7 domain 1
AF063102_at	171447	Lphn2	latrophilin 2
U56242_at	54267	Maf	v-maf musculoaponeurotic fibrosarcoma oncogene homolog (avian)
U05784_s_at	64862	Map1lc3b	microtubule-associated protein 1 light chain 3 beta		x
rc_AA955167_s_at	25603	Marcks	myristoylated alanine rich protein kinase C substrate
rc_AA859768_at	291885	Mcm5	minichromosome maintenance complex component 5	UNKNOWN	x
rc_AI176456_at	689415	Mt2A	metallothionein 2A	UNKNOWN
AB012231_s_at	29227	Nfib	nuclear factor I/B
U20796_at	259241	Nr1d2	nuclear receptor subfamily 1, group D, member 2		x
U10995_g_at	81808	Nr2f1	nuclear receptor subfamily 2, group F, member 1	UP
AF016296_at	246331	Nrp1	neuropilin 1
Z21780_at	117021	Nup155	nucleoporin 155	UP	x
rc_AA799609_g_at	81738	Nup98	nucleoporin 98
U70825_at	116684	Oplah	5-oxoprolinase (ATP-hydrolysing)
rc_H33461_at	117520	Oxr1	oxidation resistance 1
rc_AI639155_at	311726	Pcmtd2	protein-L-isoaspartate (D-aspartate) O-methyltransferase domain containing 2
rc_AA800737_at	295625	Pkp4	plakophilin 4
U61729_at	286988	Pnrc1	proline-rich nuclear receptor coactivator 1
X95577_at	83803	Prkab1	protein kinase, AMP-activated, beta 1 non-catalytic subunit	UNKNOWN
M18330_at	170538	Prkcd	protein kinase C, delta		x
rc_AA800199_at	363004	Prr13	proline rich 13
L19180_g_at	25529	Ptprs	protein tyrosine phosphatase, receptor type, S
rc_AA800519_at	311266	Qser1	Glutamine and serine rich 1
D25233cds_at	24708	Rb1	retinoblastoma 1	DOWN	x
rc_AA892578_at	360757	RGD1307396	Similar to RIKEN cDNA 6330406I15
rc_AA875496_at	366619	RGD1309138	similar to hypothetical protein MGC9912
rc_AA892280_at	362769	RGD1311756	similar to hypothetical protein FLJ20950
rc_AA891821_at	316530	RGD735175	hypothetical protein MGC:72616
L12016_at	29743	Slc25a1	solute carrier family 25 (mitochondrial carrier, citrate transporter), member 1	UNKNOWN	x
rc_AA891308_at	362403	Slc25a26	Solute carrier family 25, member 26		x
rc_AI030175_s_at	24788	Sord	sorbitol dehydrogenase	UNKNOWN
AF033109_at	59074	Stx8	syntaxin 8
rc_AA945589_at	24912	Sult2a1	sulfotransferase family 2A, dehydroepiandrosterone (DHEA)-preferring, member 1
rc_AA800735_at	361256	Svil	supervillin
U70270UTR#1_f_at	288533	Taf6	TAF6 RNA polymerase II, TATA box binding protein (TBP)-associated factor		x
S53913_s_at	25720	Tcf12	transcription factor 12	UNKNOWN
AF057025_at	29260	Tlr4	toll-like receptor 4
U18314_at	25359	Tmpo	thymopoietin
rc_AA893853_at	192178	Tnrc6b	trinucleotide repeat containing 6B
rc_AA892284_at	304881	Tor1aip2	torsin A interacting protein 2
rc_AA874876_at	361094	Ubac2	UBA domain containing 2
rc_AI172247_at	497811	Xdh	xanthine dehydrogenase
rc_AI112516_at	29344	Zfp36l1	zinc finger protein 36, C3H type-like 1	DOWN	x
rc_AA859835_g_at	---
rc_AA859994_at	---
rc_AA860039_s_at	---
rc_AA874873_g_at	---
rc_AA875275_at	---
rc_AA891271_at	---
rc_AA893612_at	---
rc_AI012051_at	---

## Sheet: UP Omomer
Genes upregulated in the presence of Omomyc: t 90 min
Probe set ID	Gene ID	Symbol	Name	MYC target gene database	Myc binding in ES Cells
J03524_s_at	297568 /// 297572 /// 408236 /// 497794	A1i3 /// Cpamd8 /// Mug1 /// Mug2	alpha-1-inhibitor III /// C3 and PZP-like, alpha-2-macroglobulin domain containing 8 /// murinoglobulin 1/2
J00692_at	29437	Acta1	actin, alpha 1, skeletal muscle
rc_AA900769_s_at	81633	Acta2	smooth muscle alpha-actin
M22323_at	25365	Actg2	actin, gamma 2, smooth muscle, enteric
U78090_s_at	245960	Alg10	asparagine-linked glycosylation 10, alpha-1,2-glucosyltransferase homolog (S. pombe)
X77235_at	29308	Arl4a	ADP-ribosylation factor-like 4A
U07201_at	25612	Asns	asparagine synthetase	UP	x
X61933mRNA_s_at	24216	Atp4a	ATPase, H+/K+ exchanging, alpha polypeptide
D29766Poly_A_Site#1_at	25414	Bcar1	breast cancer anti-estrogen resistance 1
D10938exon_s_at	24225	Bdnf	brain derived neurotrophic factor	DOWN
L13407_i_at	24246	Camk2d	calcium/calmodulin-dependent protein kinase II delta
U84410_s_at	25402	Casp3	caspase 3	DOWN
U33287_at	29209	Casq2	calsequestrin 2 (cardiac muscle)
M61875_s_at	25406	Cd44	Cd44 molecule
AF039583_s_at	64036	Cd55	Cd55 molecule
rc_AA874943_at	313838	Cdc42ep3	CDC42 effector protein (Rho GTPase binding) 3
U23056_at	287009	Ceacam10	carcinoembryonic antigen-related cell adhesion molecule 10
L02634_s_at	85259	Cnga1	cyclic nucleotide gated channel alpha 1
D14437_s_at	65204	Cnn1	calponin 1, basic, smooth muscle
rc_AA944422_at	54321	Cnn3	calponin 3, acidic
U35099_at	116657	Cplx2	complexin 2
S66024_at	25620	Crem	cAMP responsive element modulator
M55534mRNA_s_at	25420	Cryab	crystallin, alpha B	DOWN
rc_AA945054_s_at	64001	Cyb5a	cytochrome b5 type A (microsomal)
rc_AA799474_at	300047	Cyc1	cytochrome c-1		x
rc_AA892066_at	312495	Cyp26b1	cytochrome P450, family 26, subfamily b, polypeptide 1
J04187_at	24895	Cyp2a2	cytochrome P450, family 2, subfamily a, polypeptide 2
M82855cds_s_at	171521	Cyp2c13	cytochrome P450, family 2, subfamily c, polypeptide 13
S48325_s_at	25086	Cyp2e1	cytochrome P450, family 2, subfamily e, polypeptide 1
X64401cds_s_at	25642	Cyp3a23/3a1	cytochrome P450, family 3, subfamily a, polypeptide 23/polypeptide 1
rc_AA924591_at	298423	Cyp4a3	Cytochrome P450, family 4, subfamily a, polypeptide 3
D31962cds_at	58834	Dlc1	deleted in liver cancer 1		x
rc_AA859648_at	361384	Dnajb1	DnaJ (Hsp40) homolog, subfamily B, member 1	UP	x
AF013144_at	171109	Dusp5	dual specificity phosphatase 5
rc_AI008852_at	171361	Eef1a1	Eukaryotic translation elongation factor 1 alpha 1	UP	x
X98377_at	25437	Emd	emerin
Z54212_at	25314	Emp1	epithelial membrane protein 1	UP
rc_AI169756_s_at	313729	Errfi1	ERBB receptor feedback inhibitor 1
S52128_s_at	24890	Esr1	estrogen receptor 1
M91599mRNA_g_at	25114	Fgfr4	fibroblast growth factor receptor 4	DOWN
rc_AA891527_at	63839	Fhl2	four and a half LIM domains 2
rc_AA799773_g_at	362332	Flnc	filamin C, gamma
M19651_at	25445	Fosl1	fos-like antigen 1	UP
M58364_at	29244	Gch1	GTP cyclohydrolase 1
J05181_at	25283	Gclc	glutamate-cysteine ligase, catalytic subunit	DOWN	x
S75952_at	25051	Glp1r	glucagon-like peptide 1 receptor
U83880UTR#1_g_at	25062	Gpd2	Glycerol-3-phosphate dehydrogenase 2, mitochondrial		x
rc_AA875069_at	117056	H3f3b	H3 histone, family 3B	DOWN	x
rc_AI008741_at	25694	Has2	hyaluronan synthase 2	UP	x
L05489_at	25433	Hbegf	heparin-binding EGF-like growth factor
AF008587_s_at	29199	Hfe	hemochromatosis
X54249mRNA_s_at	29721	Hivep2	human immunodeficiency virus type I enhancer binding protein 2	DOWN
D26393exon_s_at	25059	Hk2	hexokinase 2	UP	x
M29249cds_at	25675	Hmgcr	3-hydroxy-3-methylglutaryl-Coenzyme A reductase
AB003726_at	29546	Homer1	homer homolog 1 (Drosophila)
L16764_s_at	24472 /// 294254	Hspa1a /// Hspa1b	heat shock 70kD protein 1A /// heat shock 70kD protein 1B (mapped)	UP	x
M14050_s_at	25617	Hspa5	heat shock protein 5
rc_AI137583_at	25587	Id2	inhibitor of DNA binding 2	UP	x
AF000942_at	25585	Id3	inhibitor of DNA binding 3	DOWN	x
rc_AI014163_at	29596	Ifrd1	interferon-related developmental regulator 1		x
X68782cds_at	299357 /// 314509 /// 678701	Igh-6 /// LOC314509 /// LOC678701	immunoglobulin heavy chain 6 /// similar to single chain Fv antibody fragment scFv 7-10A /// hypothetical protein LOC678701
U04319_at	25556	Il1rl1	interleukin 1 receptor-like 1	UP
U76717_at	245919	Impg2	interphotoreceptor matrix proteoglycan 2
M37482_at	29200	Inhba	inhibin beta-A	DOWN
L38483_at	29146	Jag1	jagged 1
AJ007632_s_at	246325	Kcnh8	potassium voltage-gated channel, subfamily H (eag-related), member 8
U93306_at	25589	Kdr	kinase insert domain receptor
AF083331_at	117548 /// 362660	Kif1b /// Pgd	kinesin family member 1B /// phosphogluconate dehydrogenase
rc_AI071299_at	81813	Klf10	Kruppel-like factor 10
L26292_g_at	114505	Klf4	Kruppel-like factor 4 (gut)
X74800_at	100365624 /// 65261	LOC100365624 /// Myo1c	myosin IC-like /// myosin IC		x
U53513_at	246295	LOC246295	glycine-, glutamate-, thienylcyclohexylpiperidine-binding protein
rc_AI639395_at	688459	LOC688459	hypothetical protein LOC688459
rc_AA875582_at	24914	Lox	lysyl oxidase	DOWN
rc_AI639012_at	316842	Metrnl	meteorin, glial cell differentiation regulator-like
U24441_at	81687	Mmp9	matrix metallopeptidase 9
U12514_at	25483	Msx2	msh homeobox 2
Y00396mRNA_at	24577	Myc	myelocytomatosis oncogene	DOWN
S68736_at	287408	Myh1	myosin, heavy polypeptide 1, skeletal muscle, adult
rc_AA799396_at	290963	Npepo	Aminopeptidase O
J02679_s_at	24314	Nqo1	NAD(P)H dehydrogenase, quinone 1
M36074_at	25672	Nr3c2	nuclear receptor subfamily 3, group C, member 2
U17254_g_at	79240	Nr4a1	nuclear receptor subfamily 4, group A, member 1
rc_AI176710_at	58853	Nr4a3	nuclear receptor subfamily 4, group A, member 3
U02320_s_at	112400	Nrg1	neuregulin 1
U88958_at	83834	Nrn1	neuritin 1
AF000899_at	245922	Nupl1	nucleoporin like 1		x
AF091575_at	405997	Olr1530	olfactory receptor 1530
X90651_at	81739	P2rx3	purinergic receptor P2X, ligand-gated ion channel, 3
AB005540_at	314743	Pctk2	PCTAIRE protein kinase 2
U48247_g_at	64353	Pdlim5	PDZ and LIM domain 5
AB016532_at	63840	Per2	period homolog 2 (Drosophila)		x
S67900_s_at	24640	Pfkfb2	6-phosphofructo-2-kinase/fructose-2,6-biphosphatase 2
L16922_at	25154	Pgr	progesterone receptor
D64047_at	60664	Pik3r3	phosphoinositide-3-kinase, regulatory subunit 3 (gamma)
X71898_at	50692	Plaur	plasminogen activator, urokinase receptor	DOWN
rc_AI639058_s_at	311676	Pmepa1	prostate transmembrane protein, androgen induced 1
AF020618_at	171071	Ppp1r15a	protein phosphatase 1, regulatory (inhibitor) subunit 15A
M20722_s_at	287750	Prp2l1	proline rich protein 2-like 1
rc_AI102868_at	293820	Psat1	phosphoserine aminotransferase 1		x
L25925_s_at	29527	Ptgs2	prostaglandin-endoperoxide synthase 2
L27843_s_at	29463	Ptp4a1	protein tyrosine phosphatase 4a1
D38072_at	117255	Ptpn12	protein tyrosine phosphatase, non-receptor type 12
L12025_at	25066	PVR	poliovirus receptor
D30734_at	25597	Rasa2	RAS p21 protein activator 2		x
rc_AI137331_at	81762	Rock1	Rho-associated coiled-coil containing protein kinase 1	DOWN
rc_AI177054_at	293418	Rpl27a	ribosomal protein L27a	UP	x
rc_AI172293_at	140910	Sc4mol	sterol-C4-methyl oxidase-like
S61868_at	24771	Sdc4	syndecan 4
X95286cds_at	29751	Sema3a	sema domain, immunoglobulin domain (Ig), short basic domain, secreted, (semaphorin) 3A
M24067_at	24617	Serpine1	serine (or cysteine) peptidase inhibitor, clade E, member 1	UP
rc_AA800318_at	295703	Serping1	serine (or cysteine) peptidase inhibitor, clade G, member 1
X99773mRNA_s_at	171149	Serpini2	serine (or cysteine) peptidase inhibitor, clade I, member 2
rc_AA955859_at	117259	Sfrs10	Splicing factor, arginine/serine-rich 10 (transformer 2 homolog, Drosophila)		x
X63744_at	29483	Slc1a3	solute carrier family 1 (glial high affinity glutamate transporter), member 3
M13979_at	24778	Slc2a1	solute carrier family 2 (facilitated glucose transporter), member 1	UP
rc_AA957917_s_at	25648	Slc7a1	solute carrier family 7 (cationic amino acid transporter, y+ system), member 1	UNKNOWN	x
U53420_at	140448	Slc8a3	solute carrier family 8 (sodium/calcium exchanger), member 3
AF067727_s_at	25671	Smad1	SMAD family member 1
M83143_g_at	25197	St6gal1	ST6 beta-galactosamide alpha-2,6-sialyltranferase 1
M83107_g_at	25123	Tagln	transgelin
rc_AI639237_at	313308	Thoc2	THO complex 2
U15550_at	116640	Tnc	tenascin C
M15474cds_s_at	24851	Tpm1	tropomyosin 1, alpha	UNKNOWN
rc_H31287_g_at	246273	Trib3	tribbles homolog 3 (Drosophila)		x
rc_AA859473_at	89818	Vamp5	Vesicle-associated membrane protein 5
AB006880mRNA_at	259227	Vof16	ischemia related factor vof-16
E13890cds_s_at	170956	Ythdc1	YTH domain containing 1		x
rc_AI136891_at	29344	Zfp36l1	zinc finger protein 36, C3H type-like 1	DOWN
U56732_at	246264	Zfp382	zinc finger protein 382
AFFX_Rat_beta-actin_M_st	---
rc_AA858570_at	---
rc_AA900503_at	---
rc_AA955600_at	---
rc_AI071866_s_at	---
rc_AI103396_at	---
rc_AI639195_i_at	---
rc_AI639451_at	---
rc_H31955_at	---
rc_H33528_at	---
rc_H33636_at	---
S56464mRNA_at	---
S56464mRNA_g_at	---

## Sheet: DOWN Omomer
Genes downregulated in the presence of Omomyc: t 90 min
Probe set ID	Gene ID	Symbol	Name	MYC target gene database	Myc binding in ES Cells
D90038_at	25270	Abcd3	ATP-binding cassette, sub-family D (ALD), member 3	UP
U64451_at	25618	Acadsb	acyl-Coenzyme A dehydrogenase, short/branched chain
rc_AA859980_at	308100	Acat2	acetyl-Coenzyme A acetyltransferase 2		x
U35775_at	25230	Add3	adducin 3 (gamma)
rc_AA893280_at	298199	Adfp	adipose differentiation related protein
rc_H33219_at	305544	Aftph	aftiphilin
rc_AA943892_at	24179	Agt	angiotensinogen (serpin peptidase inhibitor, clade A, member 8)
rc_AA894304_at	191572	Ahnak	AHNAK nucleoprotein (desmoyokin)
U23146cds_s_at	83425	Akap12	A kinase (PRKA) anchor protein (gravin) 12	DOWN	x
rc_AA892821_at	171445	Akr7a2	aldo-keto reductase family 7, member A2 (aflatoxin aldehyde reductase)	UNKNOWN
rc_AA799664_at	24185	Akt1	V-akt murine thymoma viral oncogene homolog 1	DOWN
M73714_at	65183	Aldh3a2	aldehyde dehydrogenase family 3, subfamily A2
U20643mRNA#2_f_at	24189	Aldoa	aldolase A
rc_AA800222_at	---	Amfr_predicted	Autocrine motility factor receptor (predicted)		x
rc_AA892346_at	305420	Anapc4	anaphase promoting complex subunit 4
rc_AA874832_at	288671	Anapc5	anaphase-promoting complex subunit 5	UP
rc_AA891902_at	303292	Ankfy1	ankyrin repeat and FYVE domain containing 1
rc_AA875143_at	368062	Ankib1	ankyrin repeat and IBR domain containing 1
rc_AI171167_at	79124	Anxa4	annexin A4	DOWN
rc_AA893202_at	360785	Ap1s1	adaptor protein complex AP-1, sigma 1
rc_AA800277_at	366618	Ap4s1	adaptor-related protein complex AP-4, sigma 1	UNKNOWN
rc_AA800566_g_at	365872	Aph1a	anterior pharynx defective 1a homolog (C. elegans)
rc_AA800319_at	315108 /// 681351	Apol3	apolipoprotein L 3	DOWN
rc_AA893708_at	366163	Aqr	aquarius	UNKNOWN	x
L12384_at	79117	Arf5	ADP-ribosylation factor 5	UP
rc_AA859562_at	114559	Arhgef7	Rho guanine nucleotide exchange factor (GEF7)
rc_AA892318_g_at	288656	Arl6ip4	ADP-ribosylation factor-like 6 interacting protein 4
M91590_g_at	25388	Arrb2	arrestin, beta 2	UNKNOWN	x
D13978_s_at	59085	Asl	argininosuccinate lyase
rc_AA799531_at	299507	Asnsd1	asparagine synthetase domain containing 1
rc_AA894340_at	293526	Ate1	arginine-tRNA-protein transferase 1
rc_AA799778_at	171375	Atp5f1	ATP synthase, H+ transporting, mitochondrial F0 complex, subunit b, isoform 1		x
X54510_g_at	94271	Atp5j	ATP synthase, H+ transporting, mitochondrial F0 complex, subunit F6		x
AF035387_at	83615	Atp6ap1	ATPase, H+ transporting, lysosomal accessory protein 1		x
rc_AA893217_at	685232	Atp6v1a	ATPase, H+ transporting, lysosomal V1 subunit A		x
rc_AA799824_at	299971	Atp6v1c1	ATPase, H+ transporting, V1 subunit C, isoform 1
rc_AA893246_at	299159	Atp6v1d	ATPase, H+ transporting, V1 subunit D		x
rc_AA859688_at	361215	Auh	AU RNA binding protein/enoyl-coenzyme A hydratase	UP
rc_AA892014_s_at	114612	Bat1a	HLA-B-associated transcript 1A		x
rc_AA800673_at	293017	Bclaf1	BCL2-associated transcription factor 1		x
rc_AI030286_s_at	24225	Bdnf	brain derived neurotrophic factor	DOWN
rc_AA891035_at	114558	Becn1	beclin 1 (coiled-coil, myosin-like BCL2-interacting protein)
rc_AA892602_at	54400	Bet1l	blocked early in transport 1 homolog (S. cerevisiae) like		x
rc_AA893584_at	293938	Bloc1s2	biogenesis of lysosome-related organelles complex-1, subunit 2
X58830_at	25644	Bmp6	bone morphogenetic protein 6
rc_AA859938_at	140923	Bnip3l	BCL2/adenovirus E1B 19 kDa-interacting protein 3-like	DOWN
rc_AA892835_at	366434	Btf3l4	basic transcription factor 3-like 4		x
rc_AA875004_at	300687	Bud13	BUD13 homolog (S. cerevisiae)
rc_AA799803_at	312705	C1r	complement component 1, r subcomponent
D88250_at	192262	C1s	complement component 1, s subcomponent
X14265_at	24244	Calm3	calmodulin 3		x
rc_AA893230_at	691455	Calml4	calmodulin-like 4
rc_AA894004_at	297339	Capg	capping protein (actin filament), gelsolin-like	DOWN
L09120_at	29154	Capn2	calpain 2
rc_AA892814_s_at	29156	Capns1	calpain, small subunit 1		x
rc_AA891917_at	691149	Capza1	capping protein (actin filament) muscle Z-line, alpha 1	UNKNOWN
rc_AA892842_at	493810	Capza2	capping protein (actin filament) muscle Z-line, alpha 2
U34684_s_at	64314	Casp2	caspase 2		x
rc_AA893853_at	192178	Cbl27	androgen receptor-related apoptosis-associated protein CBL27
rc_AA860044_at	498404	Ccdc117	coiled-coil domain containing 117
rc_AA998164_s_at	25203	Ccnb1	cyclin B1	UP	x
X75207_s_at	58919	Ccnd1	cyclin D1	DOWN	x
rc_AA893699_s_at	362201	Ccndbp1	cyclin D-type binding-protein 1
rc_AA799545_at	295230	Cct3	chaperonin subunit 3 (gamma)	UP	x
rc_AA800005_at	64315	Cd151	CD151 antigen	DOWN	x
L02121_at	140908	Cdk5	cyclin-dependent kinase 5
rc_AA799745_at	80278	Cdk5rap3	CDK5 regulatory subunit associated protein 3		x
rc_AA892308_at	287278	Cdkn2aipnl	CDKN2A interacting protein N-terminal like
M65149_at	25695	Cebpd	CCAAT/enhancer binding protein (C/EBP), delta
M92059_s_at	54249	Cfd	complement factor D (adipsin)
rc_AA799633_at	297436	Chchd6	coiled-coil-helix-coiled-coil-helix domain containing 6
rc_AA799822_at	365024	Chmp1a	chromatin modifying protein 1A
X67250_at	84030	Chn1	chimerin (chimaerin) 1
rc_AA892238_at	315447	Chordc1	cysteine and histidine-rich domain (CHORD)-containing 1		x
rc_AA892557_at	316035	Cmtm6	CKLF-like MARVEL transmembrane domain containing 6
rc_AA893357_at	308113	Cnksr3	Cnksr family member 3
rc_AA800637_at	299805	Cnot2	CCR4-NOT transcription complex, subunit 2
rc_AA859593_at	50998	Coil	Coilin	UNKNOWN	x
rc_AA875531_s_at	84352	Col1a2	Collagen, type I, alpha 2	DOWN
U62897_at	25306	Cpd	carboxypeptidase D	DOWN
rc_AA893683_at	298916	Cpsf3	cleavage and polyadenylation specificity factor 3		x
rc_AA799667_at	304277	Cpsf4	cleavage and polyadenylation specific factor 4
rc_AA893183_at	365407	Cpsf7	cleavage and polyadenylation specific factor 7
J05470_at	25413	Cpt2	carnitine palmitoyltransferase 2
rc_AA799418_at	114205	Crcp	calcitonin gene-related peptide-receptor component protein
D17512_at	338401	Crip2	cysteine-rich protein 2
rc_AA891769_at	363158	Crtap	cartilage associated protein		x
E13557cds_s_at	60356	Csad	cysteine sulfinic acid decarboxylase
L15618_at	116549	Csnk2a1	casein kinase II, alpha 1 polypeptide		x
U82626_at	29486	Cspg6	chondroitin sulfate proteoglycan 6
rc_AA893059_at	619580	Ctps2	cytidine triphosphate synthase II
rc_AI235585_s_at	171293	Ctsd	cathepsin D		x
rc_AA892228_at	362160	Cugbp1	CUG triplet repeat, RNA binding protein 1		x
rc_AA799474_at	300047	Cyc1	cytochrome c-1		x
rc_AA799721_g_at	100362155	Cyhr1	cysteine and histidine rich 1
rc_AA800784_at	83476	Cyr61	cysteine rich protein 61
rc_AI010581_at	25045	Dbi	diazepam binding inhibitor	UNKNOWN	x
rc_AA800743_at	83527	Dbnl	drebrin-like
rc_AA800803_g_at	360639	Dcakd	dephospho-CoA kinase domain containing
AF063447_at	89827	Ddx39	DEAD (Asp-Glu-Ala-Asp) box polypeptide 39		x
rc_AA892042_at	317335	Ddx3x	DEAD/H (Asp-Glu-Ala-Asp/His) box polypeptide 3, X-linked
U25746_at	245957	Ddx46	DEAD (Asp-Glu-Ala-Asp) box polypeptide 46
rc_H33750_at	287380	Dhrs7b	dehydrogenase/reductase (SDR family) member 7B		x
rc_AI639188_at	304859	Dhx9	DEAH (Asp-Glu-Ala-His) box polypeptide 9		x
rc_AA892562_g_at	170944	Dkc1	dyskeratosis congenita 1, dyskerin	UP
rc_AA874827_at	289997	Dlg7	discs, large homolog 7 (Drosophila)
U14950_at	25252	Dlgh1	discs, large homolog 1 (Drosophila)		x
rc_AA800551_at	65028	Dnaja	DnaJ (Hsp40) homolog, subfamily A, member 1		x
rc_AA859648_at	361384	Dnajb1	DnaJ (Hsp40) homolog, subfamily B, member 1	UP	x
rc_AA891542_at	313811	Dnajb5	DnaJ (Hsp40) homolog, subfamily B, member 5
rc_AI011998_at	24908	Dnajb9	DnaJ (Hsp40) homolog, subfamily B, member 9		x
rc_AA893353_at	301529	Dnpep	aspartyl aminopeptidase		x
rc_AA892483_at	315496	Dpy19l1	dpy-19-like 1 (C. elegans)
rc_H31695_at	497778	Dut	Deoxyuridine triphosphatase		x
rc_H33491_at	117278	Ebp	phenylalkylamine Ca2+ antagonist (emopamil) binding protein
rc_AA891746_at	296570	Edf1	endothelial differentiation-related factor 1
rc_AI008852_at	171361	Eef1a1	Eukaryotic translation elongation factor 1 alpha 1	UP	x
rc_AA892417_at	94268	Efna1	ephrin A1
rc_AA892137_at	499882	Eid1	EP300 interacting inhibitor of differentiation 1		x
rc_AA891553_at	362952	Eif3s7	eukaryotic translation initiation factor 3, subunit 7 (zeta)		x
rc_AA875205_g_at	288516	Eif3s9	eukaryotic translation initiation factor 3, subunit 9 (eta)	UP	x
L20823_at	25130	Epim	epimorphin
X03362_at	24337	Erbb2	v-erb-b2 erythroblastic leukemia viral oncogene homolog 2, neuro/glioblastoma derived oncogene homolog (avian)	DOWN
rc_AA892791_at	292673	Ercc1	excision repair cross-complementing rodent repair deficiency, complementation group 1		x
rc_AA800719_at	287177	Ergic1	endoplasmic reticulum-golgi intermediate compartment (ERGIC) 1
U36482_at	117030	Erp29	endoplasmic reticulum protein 29		x
U72497_at	29347	Faah	fatty acid amide hydrolase
rc_AA800258_at	619573	Fam104a	family with sequence similarity 104, member A
rc_AA799328_at	499322	Fam111a	family with sequence similarity 111, member A
rc_AA875042_at	361774	Fam160b1	family with sequence similarity 160, member B1
rc_AA892868_at	306015	Fam160b2	family with sequence similarity 160, member B2
rc_AA892916_at	366227	Fam18b2	family with sequence similarity 18, member B2
rc_AA892310_at	498600	Fam32a	family with sequence similarity 32, member A
rc_AA892550_g_at	300724	Fbxo22	F-box only protein 22		x
rc_AA799654_at	362081	Fbxw5	F-box and WD-40 domain protein 5
M32062_g_at	100362543 /// 116591 /// 498276	Fcgr3	Fc receptor, IgG, low affinity III
rc_AI180013_at	29558	Fcgrt	Fc receptor, IgG, alpha chain transporter	DOWN
rc_AA800782_at	499349	Fgfbp3	fibroblast growth factor binding protein 3
S54008_i_at	79114	Fgfr1	Fibroblast growth factor receptor 1	DOWN	x
rc_AA799971_at	298250	Fggy	FGGY carbohydrate kinase domain containing
rc_AA892820_at	306204	Flnb	filamin, beta
rc_AA799773_g_at	362332	Flnc	filamin C, gamma (actin binding protein 280) (predicted)
rc_AA893885_s_at	303753 /// 688330	Foxk2	forkhead box K2
rc_AA859885_at	79210	Fstl1	Follistatin-like 1
rc_AI230602_at	291906	Fts	fused toes
rc_AA799645_g_at	58971	Fxyd1	FXYD domain-containing ion transport regulator 1
AF058791_at	89819	G10	maternal G10 transcript
rc_AA892486_at	367562	Gaa	glucosidase, alpha, acid	DOWN	x
L05541_at	298003	Galt	galactose-1-phosphate uridyl transferase	UNKNOWN
rc_AI029183_s_at	24392	Gja1	gap junction membrane channel protein alpha 1		x
rc_AA875225_g_at	81664	Gnai2	guanine nucleotide binding protein, alpha inhibiting 2	DOWN
rc_AA799996_at	114119	Gng10	guanine nucleotide binding protein (G protein), gamma 10	UP
M18467_at	25721	Got2	glutamate oxaloacetate transaminase 2, mitochondrial		x
rc_AA893022_at	298376	Gpx7	glutathione peroxidase 7)
rc_AA800686_at	498416	Grb10	growth factor receptor bound protein 10
rc_AI170776_s_at	81504	Grb2	growth factor receptor bound protein 2
rc_AI639037_at	314543	Gulp1	GULP, engulfment adaptor PTB domain containing 1
rc_AI232374_at	24437	H1f0	H1 histone family, member 0
rc_AA892470_at	685909	H2afv	H2A histone family, member V
M37584_at	58940	H2afz	H2A histone family, member Z	UP
rc_AA892036_at	84581	Hdac6	histone deacetylase 6	UNKNOWN
rc_AA892779_at	361351	Hdhd2	Haloacid dehalogenase-like hydrolase domain containing 2	UNKNOWN	x
rc_AA891535_at	100362903	Hiat1	hippocampus abundant gene transcript 1
rc_AI013861_at	63938	Hibadh	3-hydroxyisobutyrate dehydrogenase		x
rc_AA894259_at	290999	Higd2a	HIG1 domain family, member 2A		x
X62875mRNA_at	117062	Hmga1	high mobility group AT-hook 1	UP	x
M64986_at	25459	Hmgb1	high mobility group box 1	UP
D84418_s_at	29395	Hmgb2	high mobility group box 2
rc_AI171090_g_at	79238	Hmgcl	3-hydroxy-3-methylglutaryl-Coenzyme A lyase
M12156_at	29578	Hnrpa1	heterogeneous nuclear ribonucleoprotein A1	UP	x
rc_AA799511_at	499894	Hnrpa2b1	heterogeneous nuclear ribonucleoprotein A2/B1	UP	x
rc_AA799995_g_at	290046	Hnrpc	Heterogeneous nuclear ribonucleoprotein C		x
rc_AA799582_at	117282	Hnrpk	heterogeneous nuclear ribonucleoprotein K		x
rc_AA799735_g_at	29546	Homer1	homer homolog 1 (Drosophila)
S83279_at	79244	Hsd17b4	hydroxysteroid (17-beta) dehydrogenase 4
rc_AI170613_g_at	25462	Hspe1	heat shock 10 kDa protein 1 (chaperonin 10)	UP	x
rc_AA892314_at	24479	Idh1	isocitrate dehydrogenase 1 (NADP+), soluble		x
rc_AA891785_at	361596	Idh2	isocitrate dehydrogenase 2 (NADP+), mitochondrial	UP
rc_AA799711_at	288264	Ifnar1	interferon (alpha and beta) receptor 1	UNKNOWN
rc_AI011179_at	58845	Igbp1	immunoglobulin (CD79A) binding protein 1	UNKNOWN	x
rc_AA799369_at	315697	Imp3	IMP3, U3 small nucleolar ribonucleoprotein, homolog (yeast)		x
rc_AA892937_at	297597	Ing4	inhibitor of growth family, member 4
rc_H31118_at	289181	Iqwd1	IQ motif and WD repeats 1
M34253_g_at	24508	Irf1	interferon regulatory factor 1
rc_AA799520_at	290364	Itm2b	integral membrane protein 2B	DOWN
X59993_at	312440	Jmjd1a	jumonji domain containing 1A
rc_AA945867_at	24516	Jun	Jun oncogene	DOWN
rc_AA891041_at	24517	Junb	Jun-B oncogene	UNKNOWN	x
rc_AA892250_at	292028	Kars	lysyl-tRNA synthetase	UP	x
rc_AA875233_s_at	25524	Kcmf1	Potassium channel modulatory factor 1	UP	x
rc_AA894160_at	117268	Khdrbs1	KH domain containing, RNA binding, signal transduction associated 1		x
rc_AA894104_at	363192	Klhdc3	kelch domain containing 3
rc_AA800170_at	303792	Klhl22	kelch-like 22 (Drosophila)
rc_AA800739_at	685656	Kti12	KTI12 homolog, chromatin associated (S. cerevisiae)
M32016_at	24944	Lamp2	Lysosomal membrane glycoprotein 2	DOWN
rc_AA874830_at	58935	Ldhal6b	Lactate dehydrogenase A-like 6B
U07181_g_at	24534	Ldhb	lactate dehydrogenase B	UP
rc_AA894212_at	308309	Leng4	leukocyte receptor cluster (LRC) member 4		x
rc_AA799301_at	498225	Lgtn	ligatin
rc_AI639510_at	---	Lig4_predicted	ligase IV, DNA, ATP-dependent (predicted)		x
rc_AA799637_g_at	499443	Lims1	LIM and senescent cell antigen-like domains 1	DOWN
U72353_at	116685	Lmnb1	lamin B1
rc_AA894009_g_at	100302372	LOC100302372	hypothetical protein LOC100302372
rc_AA891790_at	100360936	LOC100360936	rCG22080-like
rc_AA875617_at	100363361	LOC100363361	zinc finger protein 687-like
rc_AA891221_at	293103	LOC293103	similar to RIKEN cDNA 0610007P06
rc_AA892796_at	301124	LOC301124	hypothetical LOC301124
X07686cds_s_at	100364265 /// 498826 /// 499182 /// 501503	LOC361117	similar to Rb1-inducible coiled coil protein 1
rc_AI639411_at	362855	LOC362855	P55
rc_AA800678_g_at	100361376	LOC363328	Similar to TICAM-1
rc_AI639178_at	500893	LOC500893	similar to GLI-Kruppel family member GLI4
rc_AA891209_at	501282	LOC501282	similar to lymphocyte antigen 6 complex, locus E ligand
rc_AA893980_g_at	678741	LOC678741	similar to Zinc finger CCCH-type domain containing protein 6
rc_AI639336_at	682914	LOC682914	similar to Zinc finger protein 326 (Zinc finger protein-associated with nuclear matrix of 75 kDa)
rc_AA892921_at	683667	LOC683667	similar to sorcin
rc_AA893307_at	689116	LOC684506	similar to SMP3 mannosyltransferase
X59961cds#2_f_at	680097	LOC684872	similar to histone 1, H2af
rc_AA892647_at	680097	LOC684887	similar to germinal histone H4 gene
rc_AA799572_at	685029	LOC685029	Similar to anaphase promoting complex subunit 13
rc_AA894234_at	685079	LOC685079	similar to Protein SYS1 homolog
rc_AA799534_at	686590	LOC686590	similar to IQ motif and Sec7 domain 1
rc_AA799657_at	686781	LOC686781	similar to NFkB interacting protein 1
rc_AA800576_at	687090	LOC687090	hypothetical protein LOC687090
rc_AA799526_at	687711	LOC687711	similar to small nuclear ribonucleoprotein D3
rc_AA799551_g_at	360571	LOC688003	hypothetical protein LOC688003
rc_AA859690_at	689399	LOC689399	hypothetical protein LOC689399
rc_AA800844_s_at	315714	Loxl1	lysyl oxidase-like 1
rc_AI232268_at	116565	Lrpap1	low density lipoprotein receptor-related protein associated protein 1
S87522_g_at	299732	Lta4h	leukotriene A4 hydrolase	UP
rc_AA859829_g_at	298982	Maea	macrophage erythroblast attacher	UNKNOWN
rc_AA893082_at	54267	Maf	V-maf musculoaponeurotic fibrosarcoma oncogene homolog (avian)		x
rc_AA799744_at	246760	Mafk	v-maf musculoaponeurotic fibrosarcoma oncogene family, protein K (avian)		x
rc_AA891441_s_at	362245	Map1lc3a	microtubule-associated protein 1 light chain 3 alpha
rc_AA925762_at	25603	Marcks	myristoylated alanine rich protein kinase C substrate
rc_AA893247_at	170577	Mark3	MAP/microtubule affinity-regulating kinase 3
rc_H33101_at	313241	Mcart1	mitochondrial carrier triple repeat 1		x
rc_AI010480_g_at	81829	Mdh2	malate dehydrogenase 2, NAD (mitochondrial)
rc_AA892531_at	292889	Med25	mediator of RNA polymerase II transcription, subunit 25 homolog (yeast)		x
U41803_at	64476	Mfn2	mitofusin 2
rc_AI111401_s_at	29688	Minpp1	multiple inositol polyphosphate histidine phosphatase 1
rc_AA891916_g_at	60418	Mir16	membrane interacting protein of RGS16	UNKNOWN	x
rc_AA799796_at	361285	Mllt10	myeloid/lymphoid or mixed-lineage leukemia (trithorax homolog, Drosophila); translocated to, 10		x
M60616_at	171052	Mmp13	matrix metallopeptidase 13
rc_AA799539_at	---	Mnab_predicted	Membrane associated DNA binding protein (predicted)
rc_AA891789_at	317413	Morf4l2	mortality factor 4 like 2		x
rc_AA799550_at	282585	Mrfap1	Morf4 family associated protein 1
rc_AA892422_at	293666	mrpl11	mitochondrial ribosomal protein L11
rc_AA799440_g_at	299938	Mrpl13	mitochondrial ribosomal protein L13		x
rc_AA800272_at	300974	Mrpl3	mitochondrial ribosomal protein L3		x
rc_AA799599_at	303514	Msl1	male-specific lethal 1 homolog (Drosophila)
M83196_at	25152	Mtap1a	microtubule-associated protein 1 A	UP
rc_AA799279_at	295922	Mtch2	mitochondrial carrier homolog 2 (C. elegans)
U09870_at	64681	Mvp	major vault protein
rc_AA893611_s_at	100360898 /// 25701	Mxi1	Max interacting protein 1	UP
rc_AA894200_at	685867	Myl6	myosin, light polypeptide 6, alkali, smooth muscle and non-muscle
rc_AA866472_at	89825	Nap1l1	Nucleosome assembly protein 1-like 1	UP
rc_AA799449_g_at	361684	Nap1l4	nucleosome assembly protein 1-like 4
rc_AA893199_at	362228	Nat5	N-acetyltransferase 5 (ARD1 homolog, S. cerevisiae)
rc_AA893946_at	300149	Ncaph2	non-SMC condensin II complex, subunit H2		x
rc_AA893690_g_at	299310	Ndufb11	NADH dehydrogenase (ubiquinone) 1 beta subcomplex, 11		x
rc_AA893088_at	360850	Nek7	NIMA (never in mitosis gene a)-related expressed kinase 7		x
rc_AI177161_at	83619	Nfe2l2	nuclear factor, erythroid derived 2, like 2		x
AB012234_g_at	81524	Nfix	nuclear factor I/X
rc_AA874794_at	117089	Ngfrap1	nerve growth factor receptor (TNFRSF16) associated protein 1	UP
rc_AA859942_at	259274	Nmt1	N-myristoyltransferase 1	DOWN	x
rc_AA892258_at	85431	Nox4	NADPH oxidase 4
rc_AA893065_at	50558	Npepps	aminopeptidase puromycin sensitive
M26896_at	116564	Npr2	natriuretic peptide receptor 2
M14053_at	24413	Nr3c1	nuclear receptor subfamily 3, group C, member 1	DOWN	x
rc_AA943331_s_at	24605	Nras	neuroblastoma ras oncogene	UP	x
rc_AA875523_i_at	685867 /// 685883	Nrd1	Nardilysin, N-arginine dibasic convertase 1	DOWN
rc_AA894101_g_at	360462	Ntan1	N-terminal asparagine amidase
rc_AA799609_g_at	81738	Nup98	nucleoporin 98
U63839_at	245922	Nupl1	nucleoporin like 1	UP	x
rc_AA891920_at	296219	Nxt1	NTF2-related export protein 1	UNKNOWN	x
rc_AA800268_at	288783	Ormdl2	ORM1-like 2 (S. cerevisiae)
rc_AA800198_at	360618	Ormdl3	ORM1-like 3 (S. cerevisiae)
U47031_at	29659	P2rx4	purinergic receptor P2X, ligand-gated ion channel 4
rc_H31367_at	83572	Pafah1b1	platelet-activating factor acetylhydrolase, isoform Ib, alpha subunit 45kDa		x
AF016047_at	114113	Pafah1b3	platelet-activating factor acetylhydrolase, isoform 1b, α1 subunit	UP	x
rc_AA799575_f_at	25508	Pam	peptidylglycine alpha-amidating monooxygenase	DOWN
rc_AA800296_at	314417	Papola	poly (A) polymerase alpha
rc_AA892829_at	295443	Papss1	3'-phosphoadenosine 5'-phosphosulfate synthase 1
rc_AA800850_at	---	Pcgf4_predicted	polycomb group ring finger 4 (predicted)
U95920_at	81740	Pcm1	pericentriolar material 1	UNKNOWN
M26686_g_at	25604	Pcmt1	protein-L-isoaspartate (D-aspartate) O-methyltransferase 1	UNKNOWN	x
AF080568_at	89841	Pcyt2	phosphate cytidylyltransferase 2, ethanolamine		x
Z14118cds_g_at	25267	Pdgfra	platelet derived growth factor receptor, alpha polypeptide	DOWN
rc_AA799598_at	29554	Pdha1	pyruvate dehydrogenase E1 alpha 1	UNKNOWN
U92081mRNA_s_at	54320	Pdpn	podoplanin
rc_AA894345_at	364052	Pea15	phosphoprotein enriched in astrocytes 15	DOWN
X75253_at	29542	Pebp1	phosphatidylethanolamine binding protein 1		x
rc_AA891049_at	685607	Pfdn2	prefoldin 2		x
rc_AA892797_at	24644	Pgk1	phosphoglycerate kinase 1	UP	x
AF032872_at	83614	Pias3	protein inhibitor of activated STAT 3
rc_AA799893_at	29578	Pigc	Phosphatidylinositol glycan, class C
U39572_s_at	64161	Pik4ca	phosphatidylinositol 4-kinase, catalytic, alpha polypeptide
rc_AI102103_at	81747	Pik4cb	phosphatidylinositol 4-kinase, catalytic, beta polypeptide
rc_AA800175_at	298696	Pin1	peptidylprolyl cis/trans isomerase, NIMA-interacting 1
rc_AA894089_s_at	192256	Pja2	praja 2, RING-H2 motif containing
L25331_at	116552	Plod1	procollagen-lysine, 2-oxoglutarate 5-dioxygenase 1
rc_AA892859_at	288583	Plod3	procollagen-lysine, 2-oxoglutarate 5-dioxygenase 3	UNKNOWN	x
rc_AA800303_at	360549	Plscr3	phospholipid scramblase 3
rc_AI639151_at	368070	Pnn	pinin, desmosome associated protein		x
rc_AA892270_g_at	298098	Pole3	polymerase (DNA directed), epsilon 3 (p17 subunit)	UNKNOWN	x
rc_AA893191_g_at	246115	Ppap2c	phosphatidic acid phosphatase type 2c		x
rc_AA799980_at	24667	Ppm1b	protein phosphatase 1B, magnesium dependent, beta isoform
rc_AA859700_g_at	289219	Ppox	protoporphyrinogen oxidase
rc_AA800651_s_at	312754	Ppp2r5a	protein phosphatase 2, regulatory subunit B (B56), alpha isoform
D90035_s_at	24674	Ppp3ca	protein phosphatase 3, catalytic subunit, alpha isoform	UNKNOWN
rc_AA799650_at	64371	Prdx3	peroxiredoxin 3	UP	x
rc_AI013987_s_at	54287	Prkr	Protein kinase, interferon-inducible double stranded RNA dependent	UNKNOWN
X16554_at	29562	Prps1	phosphoribosyl pyrophosphate synthetase 1		x
rc_AA800199_at	363004	Prr13	proline rich 13
rc_AA799402_at	291355	Prtfdc1	phosphoribosyl transferase domain containing 1
M19936_at	25524	Psap	prosaposin	UNKNOWN
rc_AI102868_g_at	293820	Psat1	phosphoserine aminotransferase 1		x
rc_AA859975_at	64201	Psmc1	Peptidase (prosome, macropain) 26S subunit, ATPase 1
U77918_at	29677	Psmc3	proteasome (prosome, macropain) 26S subunit, ATPase 3		x
rc_AA892831_s_at	303353	Psmd11	proteasome (prosome, macropain) 26S subunit, non-ATPase, 11
rc_AA799887_s_at	83499	Psmd4	proteasome (prosome, macropain) 26S subunit, non-ATPase, 4
rc_AA893664_at	498433	Psme4	proteasome (prosome, macropain) activator subunit 4
rc_AI145502_s_at	29602	Ptgfrn	prostaglandin F2 receptor negative regulator
M86564_at	29222	Ptma	prothymosin alpha	UP	x
rc_AA875286_at	292888	Ptov1	prostate tumor over expressed gene 1	UNKNOWN
rc_AI180145_s_at	24697	Ptpn1	protein tyrosine phosphatase, non-receptor type 1	DOWN	x
L19180_g_at	25529	Ptprd	protein tyrosine phosphatase, receptor type, D
rc_AI639001_at	29616	Ptprm	protein tyrosine phosphatase, receptor type, M
rc_AA799616_at	365548	Pttg1ip	pituitary tumor-transforming 1 interacting protein
E03344cds_s_at	29534	Pxmp3	peroxisomal membrane protein 3
rc_AA893607_at	360820	Pxn	paxillin
rc_AA800190_at	25739	Pygb	brain glycogen phosphorylase
rc_AA800519_at	311266	Qser1	Glutamine and serine rich 1
rc_AA892753_s_at	361064	R3hcc1	R3H domain and coiled-coil containing 1
M75153_g_at	81830	Rab11a	RAB11a, member RAS oncogene family	UNKNOWN	x
rc_AA894207_g_at	246324	Rab31	RAB31, member RAS oncogene family
rc_AA800305_at	64633	Rab5a	RAB5A, member RAS oncogene family
rc_AA799784_at	84379	Rab6a	RAB6A, member RAS oncogene family
rc_AA893717_at	315298	Racgap1	Rac GTPase-activating protein 1
rc_AA900900_s_at	84014	Ralbp1	ralA binding protein 1		x
AJ002940cds_s_at	24705	Rara	retinoic acid receptor, alpha	DOWN
rc_AA894312_at	679028	Rbpsuh	recombining binding protein suppressor of hairless (Drosophila)
rc_AA800053_at	289508	Rchy1	ring finger and CHY zinc finger domain containing 1
rc_AA892548_at	---	RGD1304620_predicted	Similar to rab6 GTPase activating protein (GAP and centrosome-associated) (predicted)
rc_AA799992_at	361624	RGD1306959	similar to C11orf17 protein
rc_AA875348_at	287598	RGD1307084	Similar to RIKEN cDNA 1110001A07 gene
rc_AA892789_at	303300	RGD1307222	similar to mKIAA0664 protein
rc_AA866409_at	315903	RGD1307882	similar to CG9346-PA
rc_AA893659_at	362778	RGD1308470	similar to RIKEN cDNA 4933433P14 gene
rc_AA799680_at	361448	RGD1309759	similar to cDNA sequence BC013529
rc_AA799762_g_at	296470	RGD1310660	similar to RIKEN cDNA 2700038C09
rc_AA891537_at	288667	RGD1310861	similar to RIKEN cDNA 1500011H22
rc_H31887_at	311428	RGD1311739	similar to RIKEN cDNA 1700037H04
rc_AA875142_at	360677	RGD1311925	similar to BC003940 protein
rc_AA891546_at	100363376	RGD1560320_predicted	Similar to brain specific protein 4 (predicted)
rc_AI638997_at	315798	RGD1560796	similar to suppressor of hairy wing homolog 4 isoform 1
rc_AA800593_at	499877	RGD1562326	similar to ubiquitin-protein ligase E3-alpha
rc_AA946439_at	500351	RGD1562378	histone H4 variant H4-v.1
rc_AA891734_at	---	RGD1564930_predicted	similar to novel protein similar to Tensin Tns (predicted)
rc_AA893212_at	503252	RGD1565095	Similar to hypothetical protein MGC52110
rc_AA893793_at	362697	RGD1565310	similar to RIKEN cDNA 1110018J12
rc_AA891940_at	295342	Rhoc	ras homolog gene family, member C
rc_AA800126_at	362251	Rnpc2	RNA-binding region (RNP1, RRM) containing 2	DOWN
rc_AA891713_at	100362478	Rpl13a	ribosomal protein L13A	UNKNOWN	x
rc_AA799899_i_at	290641	Rpl18a	ribosomal protein L18A		x
X52619_at	64638	Rpl28	ribosomal protein L28		x
rc_AA892367_i_at	300079 /// 303002	Rpl3	ribosomal protein L3	UP	x
X66369_at	81770	Rpl37	ribosomal protein L37	UNKNOWN	x
rc_AA850940_at	64302	Rpl4	ribosomal protein L4	UP	x
rc_AA799672_s_at	117042 /// 500714	Rpl6	ribosomal protein L6	UP	x
rc_AA799724_at	360762	Rpo1-3	RNA polymerase 1-3		x
rc_AA893905_g_at	406230	Rpp21	ribonuclease P 21 subunit (human)
rc_AA799501_at	100364620 /// 29426	Rps4x	ribosomal protein S4, X-linked	UP	x
AB002406_at	65137	Ruvbl1	RuvB-like protein 1	UP	x
rc_AA800036_at	295105	Schip1	schwannomin interacting protein 1
rc_AA892373_at	83841	Sdcbp	syndecan binding protein	DOWN
rc_AA800250_at	157074	Sdha	succinate dehydrogenase complex, subunit A, flavoprotein (Fp)	UP
L11319_g_at	65166	Sec11l1	Sec11-like 1 (S. cerevisiae)
rc_AA859897_at	314352	Sel1l	Sel-1 suppressor of lin-12-like (C. elegans)
rc_AI230247_s_at	29360	Sepp1	selenoprotein P, plasma, 1
rc_AA893338_at	246303	Serbp1	Serpine1 mRNA binding protein 1		x
rc_AA799641_at	296350	Serinc3	serine incorporator 3
rc_AA799538_g_at	494445	Sfrs2	Similar to splicing factor, arginine/serine-rich 2	UP	x
rc_AA893939_g_at	680532	Shfm1	split hand/foot malformation (ectrodactyly) type 1
rc_AI170911_at	683381	Sin3b	SIN3 homolog B, transcription regulator (yeast)
rc_AA799614_at	361532	Sirt2	sirtuin (silent mating type information regulation 2 homolog) 2 (S. cerevisiae)
rc_AA892545_at	309131	Slc22a18	solute carrier family 22 (organic cation transporter), member 18
rc_AA894090_at	300083	Slc25a17	solute carrier family 25 (mitochondrial carrier, peroxisomal membrane protein), member 17
rc_AA800120_at	117035	Slc25a20	solute carrier family 25 (mitochondrial carnitine/acylcarnitine translocase), member 20
rc_AA892522_at	361074	Slc25a30	Solute carrier family 25, member 30
rc_AA891848_at	313139	Slc35a1	solute carrier family 35 (CMP-sialic acid transporter), member A1
rc_AA799457_at	641603	Slc41a3	solute carrier family 41, member 3
rc_AA893821_at	25631	Smad3	MAD homolog 3 (Drosophila)
rc_AI008639_at	50554	Smad4	MAD homolog 4 (Drosophila)
rc_AA891937_at	313648	Smarcal1	SWI/SNF related matrix associated, actin dependent regulator of chromatin, subfamily a-like 1
rc_H33459_g_at	361825	Smarcb1	SWI/SNF related, matrix associated, actin dependent regulator of chromatin, subfamily b, member 1		x
rc_AA874887_at	295107	Smc4l1	SMC4 structural maintenance of chromosomes 4-like 1 (yeast)
rc_AA800800_at	287522	Smg6	Smg-6 homolog, nonsense mediated mRNA decay factor (C. elegans)
U83883_at	64635	Snd1	staphylococcal nuclease domain containing 1
rc_AA891666_at	287645	Snf8	SNF8, ESCRT-II complex subunit, homolog (S. cerevisiae)
M81639_at	29140	Snn	stannin
rc_AA874928_g_at	360725	Snx4	sorting nexin 4		x
rc_AA892554_g_at	305240	Snx5	Sorting nexin 5	UP	x
rc_AI030175_s_at	24788	Sord	sorbitol dehydrogenase	UP
rc_AA892860_at	313845	Sos1	Son of sevenless homolog 1 (Drosophila)		x
rc_AA891204_s_at	24791	Sparc	secreted acidic cysteine rich glycoprotein	DOWN
M36410_g_at	29270	Spr	sepiapterin reductase
rc_AA891911_at	499660	Sprr1al	small proline-rich protein 1A-like
D37920_at	29230	Sqle	squalene epoxidase
rc_AI639167_at	113894	Sqstm1	Sequestosome 1	UNKNOWN
rc_AA891824_at	296753	Srpk2	serine/arginine-rich protein specific kinase 2
rc_AA800034_at	81784	Ssr3	signal sequence receptor, gamma	UP
rc_AA799569_at	288774	Stat2	Signal transducer and activator of transcription 2
rc_AA892246_at	361092	Stk24	serine/threonine kinase 24 (STE20 homolog, yeast)
rc_AA800712_at	361813	Stk38	serine/threonine kinase 38
rc_AI231821_at	29332	Stmn1	stathmin 1	UNKNOWN	x
L20821_at	81803	Stx4a	syntaxin 4A (placental)
U56815_at	60562	Stx6	syntaxin 6		x
rc_AI102079_at	25558	Stxbp1	syntaxin binding protein 1
rc_AA926193_at	171072 /// 316153 /// 501084 /// 501086	Sult1c2	sulfotransferase family, cytosolic, 1C, member 2
rc_AA800735_at	361256	Svil	supervillin
rc_AA800015_at	293345	Taf10	TAF10 RNA polymerase II, TATA box binding protein (TBP)-associated factor
rc_AA799452_at	83688	Taldo1	transaldolase 1		x
rc_AA893860_at	294810	Tars	threonyl-tRNA synthetase		x
rc_AA799581_at	500295	Tatdn2	TatD DNase domain containing 2
rc_AA799507_at	315880	Tbc1d2b	TBC1 domain family, member 2B		x
rc_AA892313_at	361255	Tbce	tubulin-specific chaperone e	UP
X56546_at	25640	Tcf2	transcription factor 2
rc_AA800197_at	314683	Tcp11l2	t-complex 11 (mouse) like 2		x
rc_AA799494_at	315326	Tenc1	tensin like C1 domain containing phosphatase
rc_AA875537_at	494445	Tgfbr2	Transforming growth factor, beta receptor II	DOWN
rc_AA893532_at	301373	Tgfbrap1	transforming growth factor, beta receptor associated protein 1		x
rc_AI013795_at	64679	Tgm4	transglutaminase 4 (prostate)
rc_AA860049_at	360817	Thrap2	thyroid hormone receptor associated protein 2	DOWN
rc_AA893515_at	294912	Tloc1	translocation protein 1	UNKNOWN
rc_AA799442_at	293114	Tmem126b	transmembrane protein 126B
rc_H31707_at	364298	Tmem55b	transmembrane protein 55B		x
rc_AA800814_at	287437	Tnfsf13	tumor necrosis factor (ligand) superfamily, member 13
rc_H31144_at	303882	Tnk2	tyrosine kinase, non-receptor, 2
rc_AA891796_at	681123	Tomm6	translocase of outer mitochondrial membrane 6 homolog (yeast)
rc_AA875132_at	24851	Tpm1	Tropomyosin 1, alpha	UNKNOWN
rc_AA799600_at	360491	Traf7	Tnf receptor-associated factor 7		x
rc_AA875431_at	287427	Trappc1	trafficking protein particle complex 1		x
rc_AA800622_at	299075	Trappc6b	trafficking protein particle complex 6B		x
D17469_at	25570	Trhr	thyrotropin releasing hormone receptor
rc_AA891740_at	171499	Tslpr	thymic stromal-derived lymphopoietin, receptor
rc_AA892498_at	300733	Tspan3	tetraspanin 3
rc_AA866234_at	293481	Tufm	Tu translation elongation factor, mitochondrial		x
rc_AA875390_g_at	140922	Txnl1	thioredoxin-like 1		x
rc_AA891286_at	58819	Txnrd1	thioredoxin reductase 1	UP	x
rc_AA875146_s_at	298689	Ube2j2	ubiquitin-conjugating enzyme E2, J2
rc_AA875206_at	114590	Ubqln1	ubiquilin 1	UP	x
rc_AA800039_s_at	293719	Ubxn1	UBX domain protein 1
rc_H33149_at	361151	Ufsp2	UFM1-specific peptidase 2
Y00350_at	29421	Urod	uroporphyrinogen decarboxylase	UNKNOWN
rc_AA892132_at	290627	Use1	unconventional SNARE in the ER 1 homolog (S. cerevisiae)
rc_AA894080_g_at	316599	Usp40	ubiquitin specific protease 40
rc_AA892520_g_at	287721	Vat1	vesicle amine transport protein 1 homolog (T californica)		x
rc_AA850734_at	83785	Vegfa	vascular endothelial growth factor A
rc_AA893173_at	288666	Vps29	vacuolar protein sorting 29 (S. pombe)	UNKNOWN	x
rc_AA892364_at	297695	Wbp11	WW domain binding protein 11		x
rc_AA894321_at	301549	Wdfy1	WD repeat and FYVE domain containing 1		x
rc_AA893626_at	363064	Wdr61	WD repeat domain 61		x
rc_AA800663_at	361070	Xpo7	exportin 7		x
rc_AA891938_at	362229	Xrn2	5'-3' exoribonuclease 2		x
rc_AA875019_g_at	299199	Ylpm1	YLP motif containing 1
rc_AA892376_at	293067	Za20d3	zinc finger, A20 domain containing 3
rc_AA800535_at	301081	Zdhhc3	zinc finger, DHHC domain containing 3	UNKNOWN	x
D86711_at	362156	Zdhhc5	Zinc finger, DHHC domain containing 5
rc_AA893741_at	362162	Zfp289	zinc finger protein 289
rc_AA800613_at	79426	Zfp36	zinc finger protein 36	DOWN	x
rc_AI112516_at	29344	Zfp36l1	zinc finger protein 36, C3H type-like 1	DOWN	x
rc_H31351_at	287361	Zfp496	zinc finger protein 496 (predicted)		x
rc_AA894086_at	294846 /// 619558	Zfp622	zinc finger protein 622		x
rc_AA859832_at	100190937	ZH16	ZH16 protein
M91235_f_at	---
rc_AA799340_at	---		Transcribed locus
rc_AA799518_g_at	---		Transcribed locus
rc_AA799580_at	---
rc_AA799594_at	---
rc_AA799751_at	---		Transcribed locus
rc_AA799764_at	---		Transcribed locus
rc_AA799991_at	---		Transcribed locus
rc_AA800503_at	---		Transcribed locus
rc_AA800708_at	---		Transcribed locus
rc_AA800768_at	---		Transcribed locus
rc_AA800772_at	---		Transcribed locus
rc_AA800822_at	---		Transcribed locus
rc_AA800849_f_at	---
rc_AA800855_g_at	---
rc_AA800930_at	---
rc_AA859725_at	---		Transcribed locus
rc_AA859740_at	---		Transcribed locus
rc_AA859835_g_at	---		Transcribed locus
rc_AA860039_s_at	---
rc_AA866231_at	---		Transcribed locus
rc_AA866321_at	---		Transcribed locus
rc_AA875105_at	---		Transcribed locus
rc_AA891054_at	---		Transcribed locus
rc_AA891207_at	---		Transcribed locus
rc_AA892257_at	---		Transcribed locus
rc_AA892394_g_at	---
rc_AA892832_at	---		Transcribed locus
rc_AA893032_at	---		Transcribed locus
rc_AA893208_at	---		Transcribed locus
rc_AA893534_at	---		Transcribed locus
rc_AA893569_at	---		Transcribed locus
rc_AA893811_at	---		Transcribed locus
rc_AA893970_at	---		Transcribed locus
rc_AA894188_at	---		Transcribed locus
rc_AA894232_at	---		Transcribed locus
rc_AI102044_at	---
rc_AI175776_s_at	---		Retroviral-like c-Ha-ras proto-oncogene mRNA, partial sequence
rc_AI639256_at	---		Transcribed locus
rc_AI639410_i_at	---		Transcribed locus
rc_AI639410_s_at	---		Transcribed locus
